# Supplementary material for: Comprehensive multiphase chlorine chemistry in the box model CAABA/MECCA: implications for atmospheric oxidative capacity
Source: Copernicus journal article supplement (doi:10.5194/acp-23-15165-2023), 2023-12-13
Supplement: Supplementary file 1 [file acp-23-15165-2023-supplement.zip]

# Comprehensive multiphase chlorine chemistry in the box model CAABA/MECCA: Implications to atmospheric oxidative capacity

Meghna Soni<sup>1,2</sup>, Rolf Sander<sup>3</sup>, Lokesh K. Sahu<sup>1</sup>, Domenico Taraborrelli<sup>4</sup>,  
Pengei Liu<sup>5</sup>, Ankit Patel<sup>6</sup>, Imran A Girach<sup>7</sup>, Andrea Pozzer<sup>3,8</sup>,  
Sachin S Gunthe<sup>6,9</sup>, Narendra Ojha<sup>1</sup>

<sup>1</sup> Physical Research Laboratory, Ahmedabad, India

<sup>2</sup> Indian Institute of Technology, Gandhinagar, Gujarat, India

<sup>3</sup> Atmospheric Chemistry Department, Max Planck Institute for Chemistry, Mainz, Germany

<sup>4</sup> Institute of Energy and Climate Research, Troposphere (IEK-8), Forschungszentrum Jülich GmbH, Jülich, Germany

<sup>5</sup> School of Earth and Atmospheric Sciences, Georgia Institute of Technology, Atlanta, GA, USA

<sup>6</sup> EWRE Division, Department of Civil Engineering, Indian Institute of Technology Madras, Chennai, India

<sup>7</sup> Space Applications Centre, Indian Space Research Organisation, Ahmedabad, India

<sup>8</sup> Climate and Atmosphere Research Center, The Cyprus Institute, Nicosia, Cyprus

<sup>9</sup> Centre for Atmospheric and Climate Sciences, Indian Institute of Technology Madras, Chennai, India

## 1 Model inputs

Initial concentrations of CO, CH<sub>4</sub>, NO<sub>x</sub>, non-methane hydrocarbons (NMHCs), various VOCs and aerosol properties considered for simulations over both the locations are described in Table 1 S1. The levels of gas-phase chemical species in Delhi are based on a recent field campaign conducted at Indian Institute of Delhi (IITD) during winter season of 2018 [1]. In addition to listed species in table 3 for Delhi, additional chemical species are considered for simulations which include acetone (9 nmol/mol), methanol (12 nmol/mol), acetaldehyde (6.1 nmol/mol), acetonitrile (7.5 nmol/mol), methyl ethyl ketone (1.3 nmol/mol), styrene (1.4 nmol/mol), pinene (0.14 nmol/mol), formaldehyde (1.8 nmol/mol), ethanol (1.7 nmol/mol), acetic acid (6 nmol/mol), propanol (0.4 nmol/mol), methyl vinyl ketone (0.3 nmol/mol), NH<sub>3</sub> (25.1 nmol/mol) and SO<sub>2</sub> (2.1 nmol/mol) [1–4]. Measurements of aerosols (stated in Table 1) has been carried out in another field campaign during February 2018–January 2019 in Delhi [5]. The concentration of gaseous species in Leicester are from Sommariva et al., 2018 and 2021 [6, 7]. The aerosol properties are based on previously reported studies.

Table S1: Initial values of various gases (in nmol/mol) and aerosols opted for simulations over Delhi and Leicester.

| Species                                                | Delhi     | Leicester |
|--------------------------------------------------------|-----------|-----------|
| Ozone                                                  | 26        | 20        |
| Nitrogen oxides                                        | 154       | 19        |
| Carbon monoxide                                        | 1340      | 140       |
| Methane                                                | 2250      | 1900      |
| Ethane                                                 | 20        | 6.3       |
| Ethene                                                 | 14        | 0.67      |
| Propane                                                | 29        | 2.30      |
| Propene                                                | 4         | 0.19      |
| i-Butane                                               | 11        | 0.59      |
| n-butane                                               | 22        | 0.97      |
| Acetylene                                              | 10        | 0.49      |
| Toluene                                                | 5.13      | 0.19      |
| Benzene                                                | 2.81      | 0.20      |
| Isoprene                                               | 0.80      | 0.02      |
| Xylene                                                 | 3.13      | 0.16      |
| Ethyl benzene                                          | 0.667     | 0.03      |
| 1,2,4-Trimethyl Benzene (TMB)                          | 0.834     | 0.05      |
| 1,3,5- TMB                                             | 0.427     | 0.02      |
| H <sub>2</sub> O (mol/mol)                             | 0.0146    | 0.0055    |
| Monodisperse radius ( $\mu\text{m}$ )                  | 0.11      | 0.15      |
| Liquid water content ( $\text{m}^3/\text{m}^3$ )       | 22.77E-12 | 1.2E-10   |
| NO <sub>3</sub> <sup>-</sup> (molec/cm <sup>3</sup> )  | 3.59E10   | 1.2E10    |
| SO <sub>4</sub> <sup>2-</sup> (molec/cm <sup>3</sup> ) | 2.45E10   | 7.4E9     |
| NH <sub>4</sub> <sup>+</sup> (molec/cm <sup>3</sup> )  | 1.62E11   | 5.0E10    |
| Cl <sup>-</sup> (molec/cm <sup>3</sup> )               | 1.01E11   | 3.4E9     |

## 2 Results

### 2.1 Cl<sub>2</sub> budget

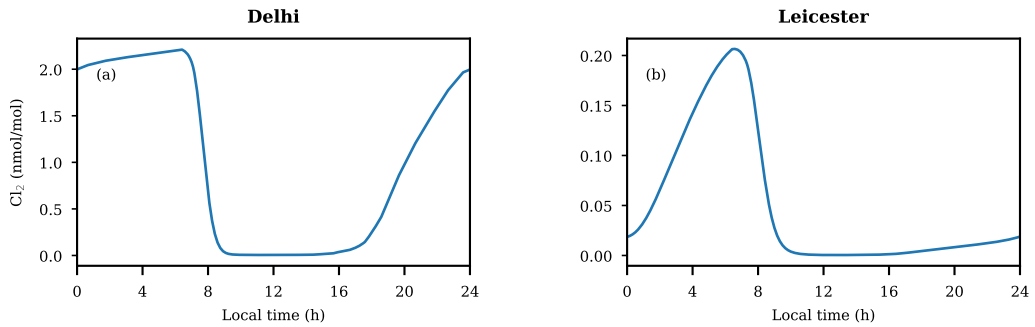

Figure S1: Diurnal variation in Cl<sub>2</sub> over (left panel) Delhi and (right panel) Leicester.

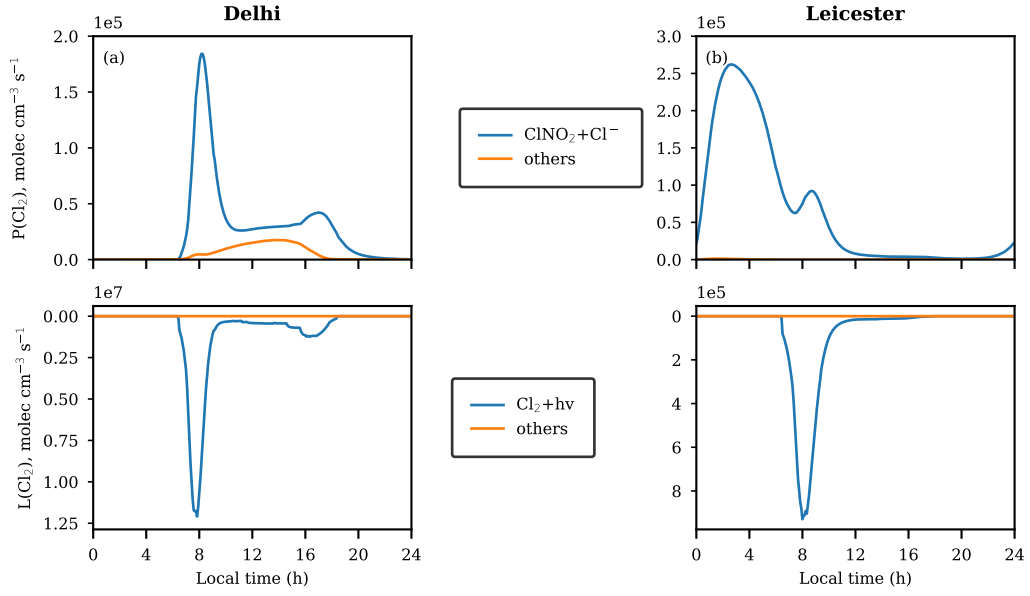

Figure S2: Production and loss of  $\text{Cl}_2$  over (left panel) Delhi and (right panel) Leicester.

## 2.2 $\text{ClNO}_2$ yield

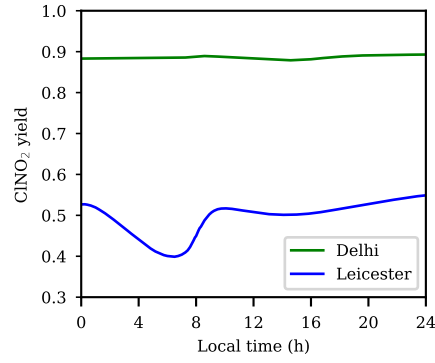

Figure S3: Model simulated  $\text{ClNO}_2$  yield in Delhi and Leicester.

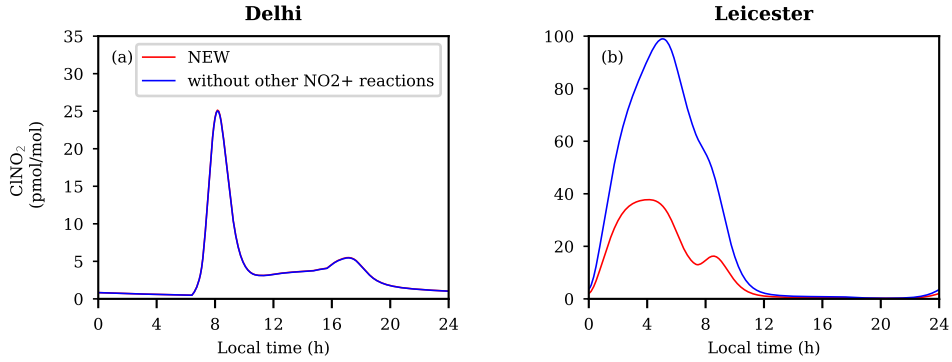

Figure S4: Diurnal variation in  $\text{ClNO}_2$  over (a) Delhi and (b) Leicester.

## 2.3 Sensitivity of air composition to chlorine chemistry

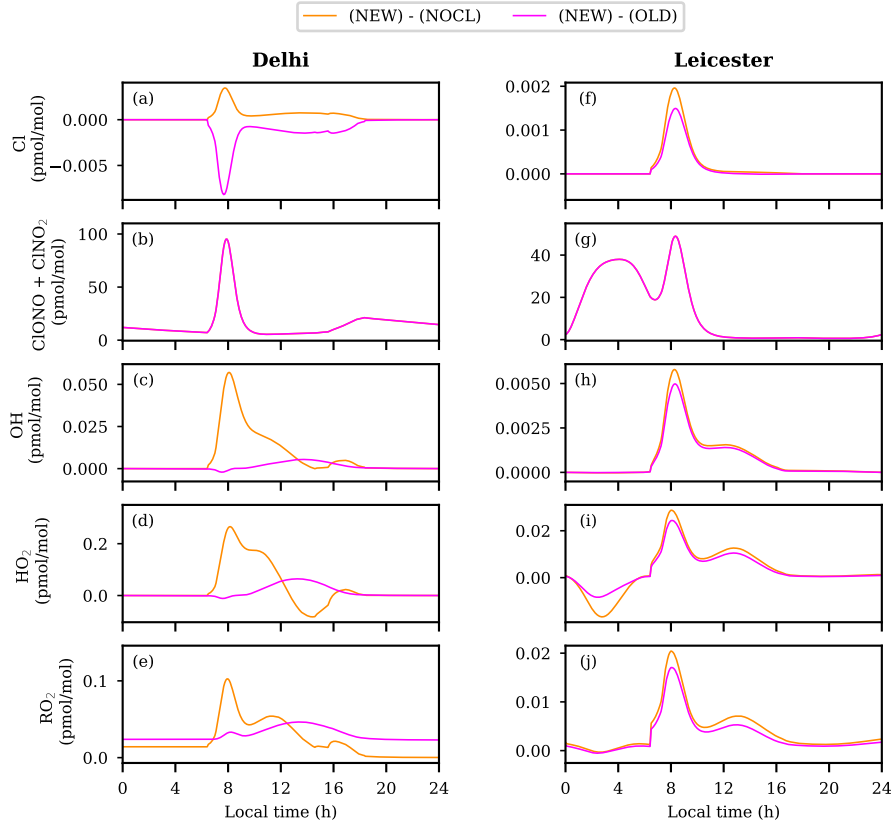

Figure S5: Differences in diurnal variation of Cl,  $\text{ClONO}_2 + \text{ClONO}$ , OH,  $\text{HO}_2$ , and  $\text{RO}_2$  in model simulations over (left panel) Delhi and (right panel) Leicester.

In addition to the gas-phase composition, Cl chemistry also alters the levels of inorganic aerosol species at both locations, including the nitronium ion ( $\text{NO}_2^+$ ), nitrate ( $\text{NO}_3^-$ ), and oxalic acid (Fig.S6). The diurnal pattern of  $\text{NO}_2^+$  is similar to that of  $\text{N}_2\text{O}_5$  because dissociation of  $\text{N}_2\text{O}_5$  is the major source of  $\text{NO}_2^+$  production (A1). Chlorine chemistry (NEW simulation) reduces the modeled concentration of  $\text{NO}_2^+$  by up to a factor of  $\approx 8$  and  $\approx 2$  in Delhi and Leicester, respectively, compared to without Cl chem simulation. Simulated  $\text{NO}_3^-$  is higher by upto 1.2 times over Delhi due to Cl chemistry. The measured mean  $\text{NO}_3^-$  over Delhi during high chloride period in winter-time is  $5.3 \pm 3.2 \text{ ug/m}^{-3}$  [5]. Simulated  $\text{NO}_3^-$  is higher by upto 1.4 times with the added Cl chemistry (NEW simulation) as compared to OLD simulation over Leicester. Simulated oxalic acid seems to be significantly higher due to Cl chemistry over Delhi and Leicester.

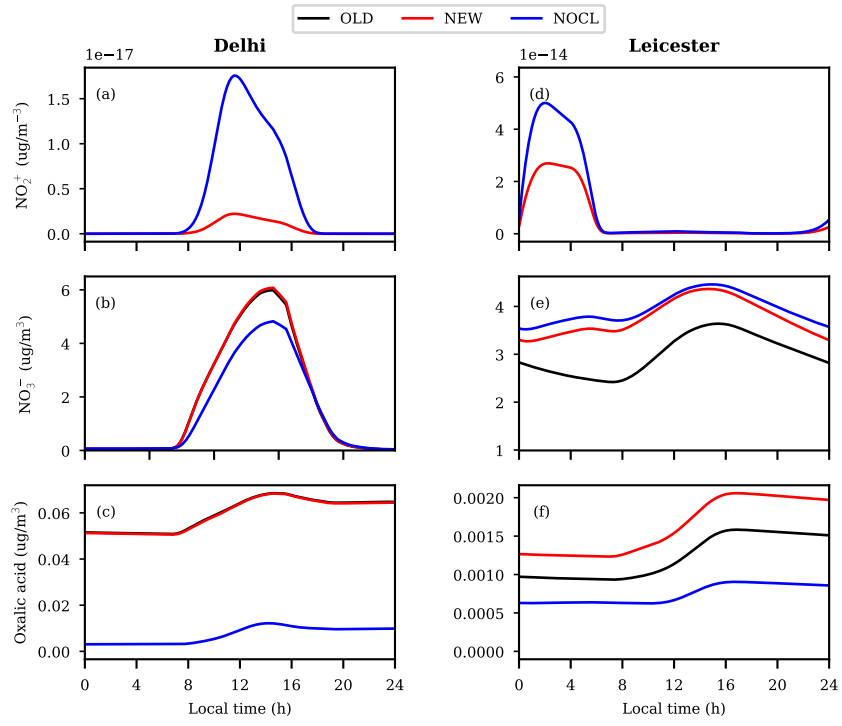

Figure S6: Impact of Cl chemistry on aerosols over (left panel) Delhi and (right panel) Leicester.

## 2.4 Sensitivity to $\text{ClNO}_2 + \text{Cl}^-$ reaction

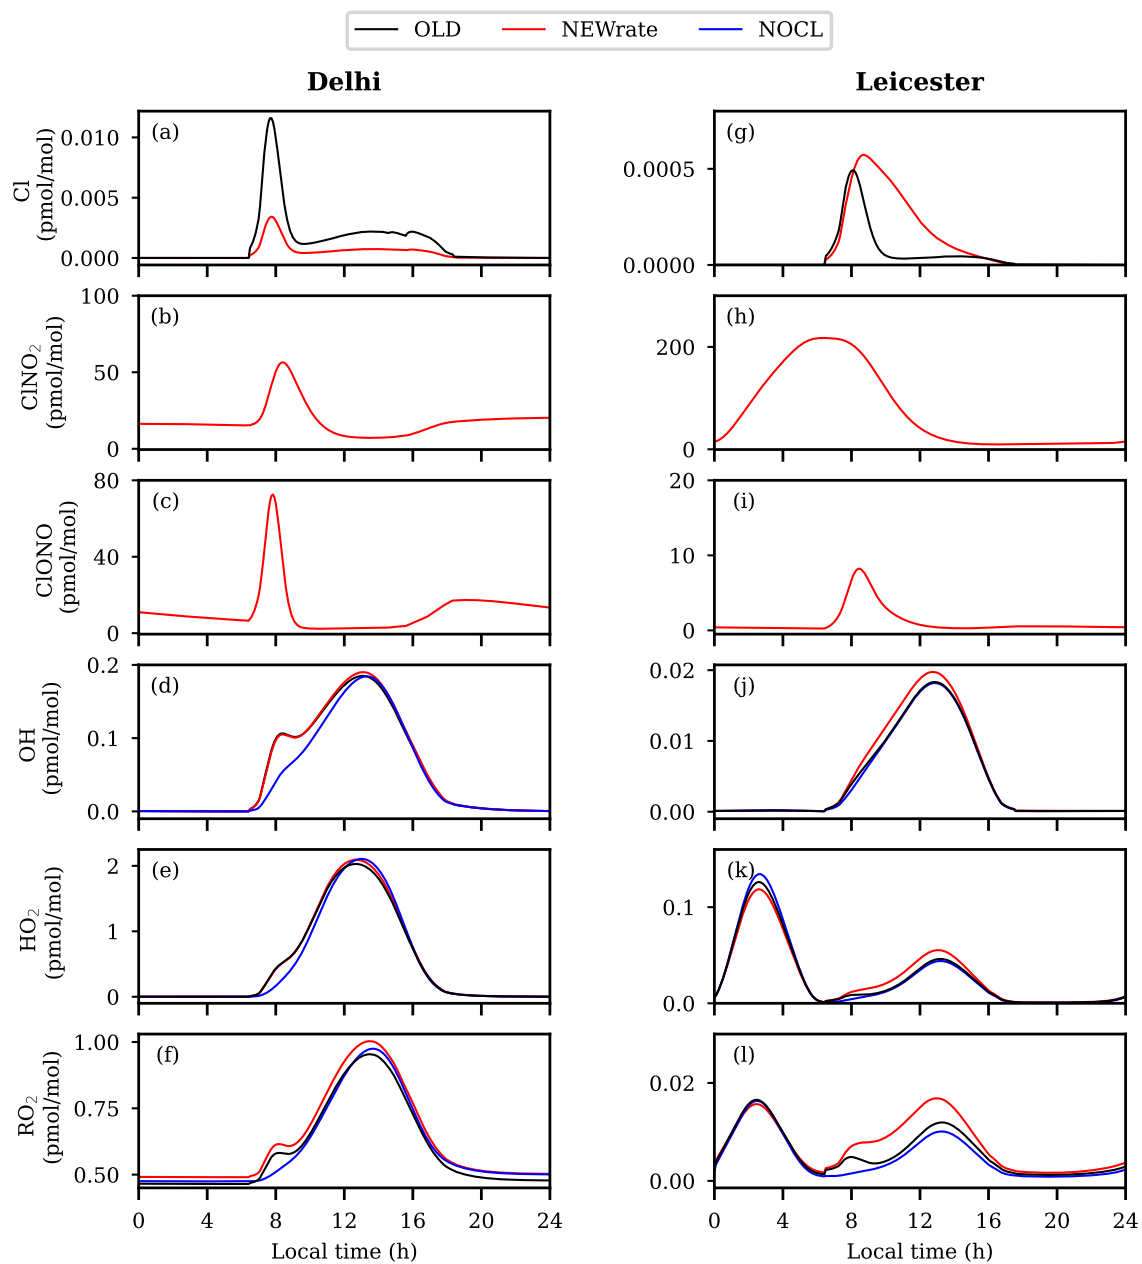

Figure S7: Model simulated diurnal variations in  $\text{Cl}$ ,  $\text{ClNO}_2$ ,  $\text{ClONO}$ ,  $\text{OH}$ ,  $\text{HO}_2$ , and  $\text{RO}_2$  in Delhi (left panel) and Leicester (right panel).

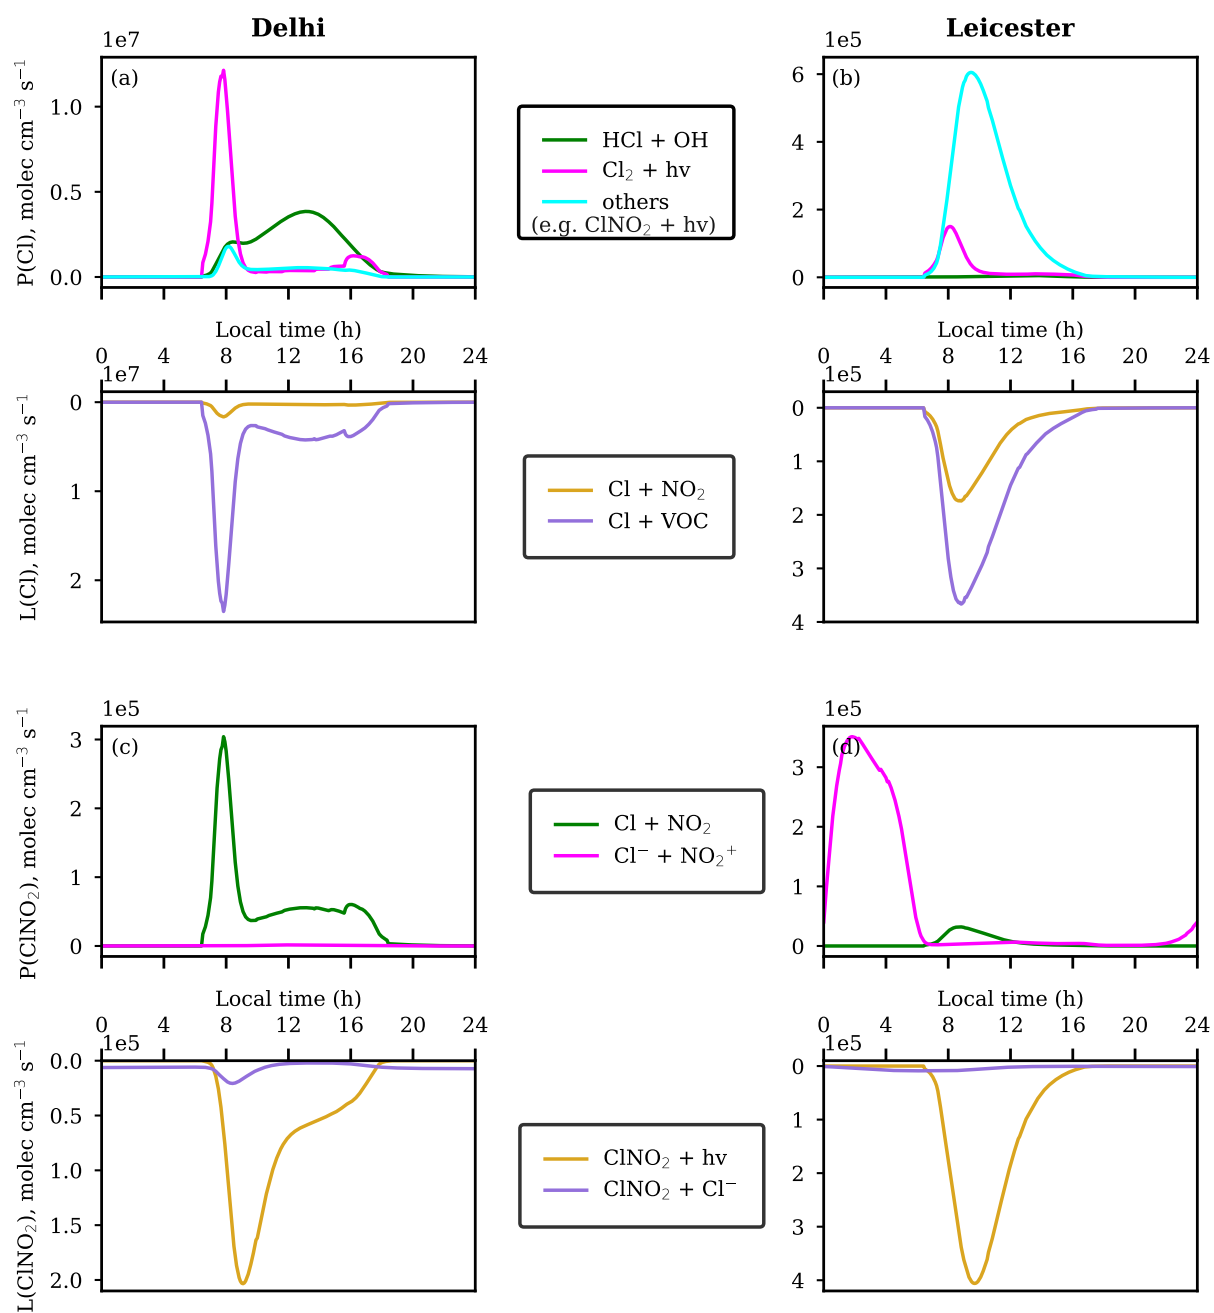

Figure S8: Production and loss of (a, b) Cl and (c, d)  $\text{ClNO}_2$  in Delhi (left panel) and Leicester (right panel) in NEWrate simulation.

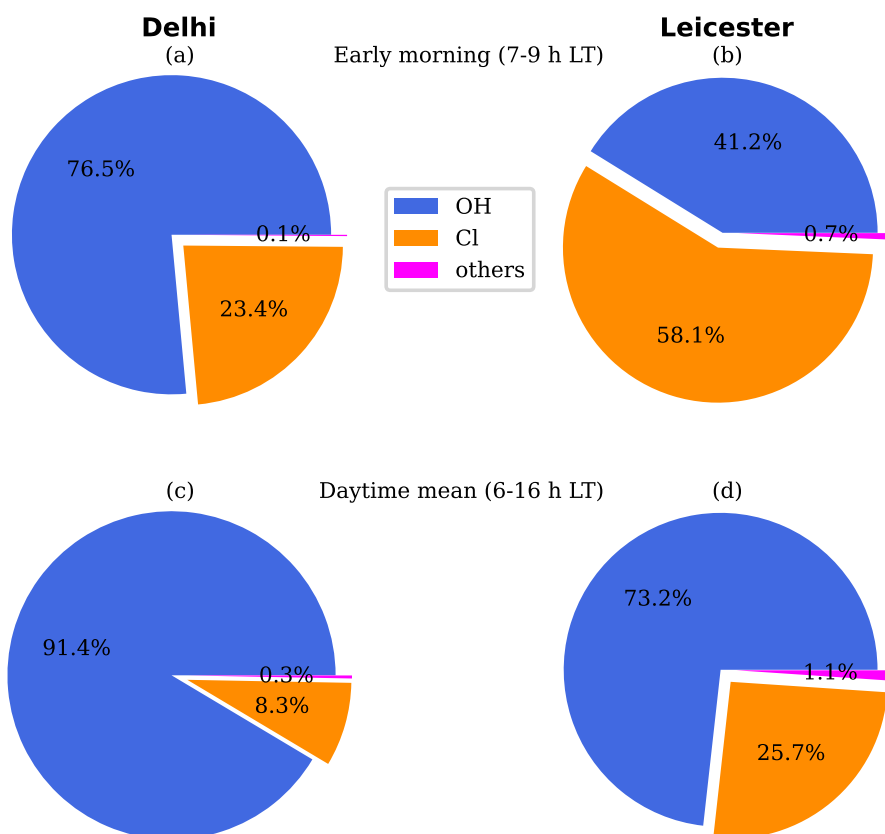

Figure S9: Atmospheric oxidative capacity (AOC) of radicals during (a, b) early morning time (7-9 h LT) and (c, d) daytime mean (6-16 h LT) in Delhi (left panel) and Leicester (right panel) as depicted in NEWrate simulation.



## References

- [1] Tripathi, N., Sahu, L. K., Wang, L., Vats, P., Soni, M., Kumar, P., et al., Characteristics of VOC composition at urban and suburban sites of New Delhi, India in winter. *Journal of Geophysical Research: Atmospheres*, 127, e2021JD035342, <https://doi.org/10.1029/2021JD035342>, 2022
- [2] Kumar, A., Singh, D., Kumar, K., Singh, B., Jain, V., Distribution of VOCs in urban and rural atmospheres of subtropical India: Temporal variation, source attribution, ratios, OFP and risk assessment, *The Science of the total environment*, 613-614:492-501,doi: 10.1016/j.scitotenv.2017.09.096, 2017
- [3] Wang, L., Slowik, J. G., Tripathi, N., Bhattu, D., Rai, P., Kumar, V., Vats, P., Satish, R., Baltensperger, U., Ganguly, D., Rastogi, N., Sahu, L. K., Tripathi, S. N., and Prévôt, A. S. H.: Source characterization of volatile organic compounds measured by proton-transfer-reaction time-of-flight mass spectrometers in Delhi, India, *Atmos. Chem. Phys.*, 20, 9753–9770, <https://doi.org/10.5194/acp-20-9753-2020>, 2020.
- [4] Suneja, J., Kotnala, G., Kaur, A., Mandal, T., Sharma, S. K., Long-Term Measurements of SO<sub>2</sub> Over Delhi, India. *MAPAN-Journal of Metrology Society of India*, 35, 125-133, doi:10.1007/s12647-019-00349-1, 2020
- [5] Gunthe S.S., Liu P., Panda U. et al., Enhanced aerosol particle growth sustained by high continental chlorine emission in India. *Nat. Geosci.*, 14, 77–84, <https://doi.org/10.1038/s41561-020-00677-x>, 2021
- [6] Sommariva, R., Crilley, L. R., Ball, S. M., Cordell, R. L., Hollis, L. D. J., Bloss, W. J., Monks, P. S., Enhanced wintertime oxidation of VOCs via sustained radical sources in the urban atmosphere, *Environmental Pollution*, 274, <https://doi.org/10.1016/j.envpol.2021.116563>, 2021
- [7] Sommariva, R., Hollis, L.D.J., Sherwen, T., Baker, A.R., Ball, S.M., Bandy, B.J., Bell, T.G., Chowdhury, M.N., Cordell, R.L., Evans, M.J., Lee, J.D., Reed, C., Reeves, C.E., Roberts, J.M., Yang, M., Monks, P.S., Seasonal and geographical variability of nitryl chloride and its precursors in Northern Europe. *Atmos. Sci. Lett.*, 19, <https://doi.org/10.1002/asl.844.30>, 2018
