# Supplementary material for: Comprehensive multiphase chlorine chemistry in the box model CAABA/MECCA: implications for atmospheric oxidative capacity
Source: Copernicus journal article supplement (doi:10.5194/acp-23-15165-2023), 2023-12-13
Supplement: Supplementary file 2 [file acp-23-15165-2023-supplement.zip]

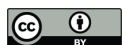

*Supplement of*

## **Comprehensive multiphase chlorine chemistry in the box model CAABA/MECCA implications for atmospheric oxidative capacity**

**Meghna Soni et al.**

*Correspondence to:* Meghna Soni (soni.meghna95@gmail.com) and Rolf Sander (rolf.sander@mpic.de)

- [acp-23-15165-2023-supplement-title-page.pdf](#)
- [supplementary-Soni\\_et\\_al](#)
  - [meccanism-Soni\\_et\\_al.pdf](#)
  - [supplementary-Soni\\_et\\_al.pdf](#)

The copyright of individual parts of the supplement might differ from the article licence.
